# Supplementary material for: An enriched environment ameliorates maternal sleep deprivation-induced cognitive impairment in aged mice by improving mitochondrial function via the Sirt1/PGC-1α pathway
Source: publisher site journal article supplement (doi:10.18632/aging.205385), 2024-01-16
Supplement: Supplementary file [file aging-v16i2-205385-supplementary-material-SD1.pdf]

## SUPPLEMENTARY FIGURES

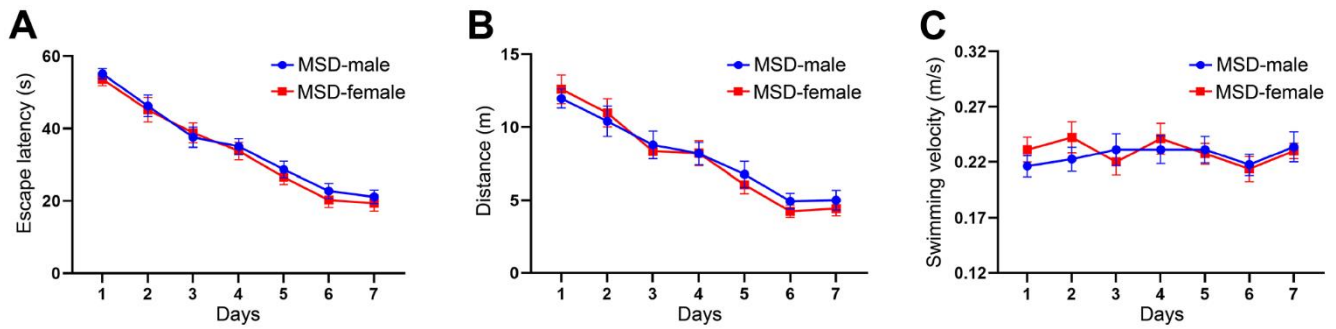

**Supplementary Figure 1. The escape latency, distance, and swimming velocity of the learning period of Morris water maze (MWM) test in the MSD groups.** The escape latency (A), distance (B), and swimming velocity (C) between male and female mice were not statistically different in the MSD groups. There are 8 male and 8 female mice in the MSD group. Error bars = SEM. MSD, maternal sleep deprivation.

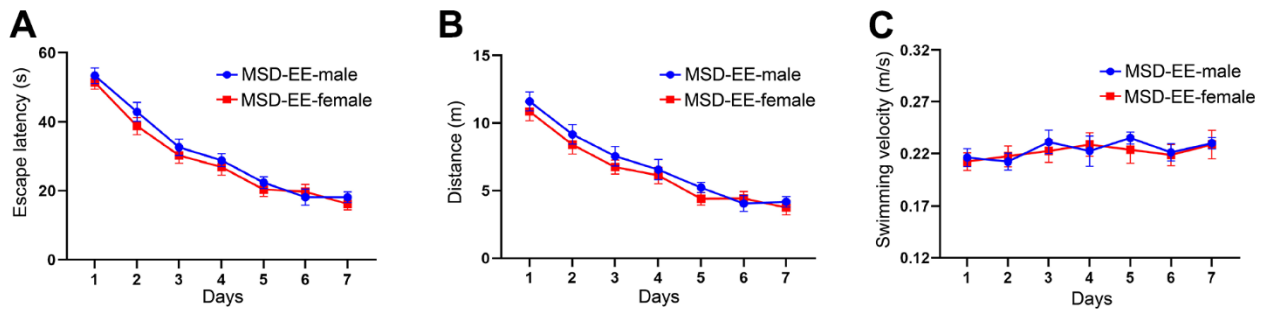

**Supplementary Figure 2. The escape latency, distance, and swimming velocity of the learning period of Morris water maze (MWM) test in the MSD-EE groups.** The escape latency (A), distance (B), and swimming velocity (C) between male and female mice were not statistically different in the MSD-EE groups. There are 8 male and 8 female mice in the MSD-EE group. Error bars = SEM. MSD, maternal sleep deprivation; EE, enriched environment.
